# Supplementary material
Source: MDPI journal article supplement (https://www.mdpi.com/2072-4292/13/24/5027)
Supplement: s1 [file s1]

**Current status and future opportunities for grain protein prediction using on-  
and off-combine sensors: a synthesis-analysis**

Leonardo M. Bastos<sup>a,\*</sup>, Andre Froes de Borja Reis<sup>a</sup>, Ajay Sharda<sup>b</sup>, Yancy Wright<sup>c</sup>, and Ignacio  
A. Ciampitti<sup>a,\*</sup>

<sup>a</sup>Department of Agronomy, Kansas State University, Manhattan, KS, USA.

<sup>b</sup>Department of Biological and Agricultural Engineering, Kansas State University, Manhattan,  
KS, USA.

<sup>c</sup>John Deere, Johnston, IA, USA.

\*Corresponding authors e-mail: [imbastos@ksu.edu](mailto:imbastos@ksu.edu), [ciampitti@ksu.edu](mailto:ciampitti@ksu.edu).

## 11 Supplementary Material

**Supplementary Table S1.** Summary of the selected studies for the review analysis including entry identification, citation, crop, and sensor-specific characteristics including sensor type, spatial resolution, the best type of spectral feature and columns identifying whether the best type of spectral feature included or not the bands of blue (400-500 nm), green (500-600 nm), red (600-700 nm), red-edge (RE, 700-800 nm), near-infrared (NIR, 800-1300 nm), and short-wave infrared (1300-1900 nm), and grain protein concentration model fit metrics. Max=maximum, Min=minimum, RMSE=root mean square error.

| Entry ID. | Citation | Crop    | Sensor type | Spatial resolution (m) | Best type of spectral feature   | Blue | Green | Red | RE  | NIR | SWIR | Max R2 | Min RMSE (%) |
|-----------|----------|---------|-------------|------------------------|---------------------------------|------|-------|-----|-----|-----|------|--------|--------------|
| 3a        | [35]     | Barley  | Remote      | 30                     | swir                            | No   | No    | No  | No  | No  | Yes  | 0.71   | 0.17         |
| 3b        | [35]     | Sorghum | Remote      | 30                     | nir                             | No   | No    | No  | No  | Yes | No   | 0.03   |              |
| 3c        | [35]     | Wheat   | Remote      | 15                     | nir                             | No   | No    | No  | No  | Yes | No   | 0.22   |              |
| 3d        | [35]     | Wheat   | Remote      | 30                     | nir                             | No   | No    | No  | No  | Yes | No   | 0.64   |              |
| 4a        | [41]     | Wheat   | Remote      | 2.5                    | SR(nir,r)                       | No   | No    | Yes | No  | Yes | No   | 0.35   |              |
| 4b        | [41]     | Wheat   | Remote      | 1                      | nir                             | No   | No    | No  | No  | Yes | No   | 0.36   |              |
| 8         | [44]     | Wheat   | Proximal    |                        | ND(g,b)                         | Yes  | Yes   | No  | No  | No  | No   | 0.97   |              |
| 10a       | [46]     | Wheat   | Remote      | 2.5                    | nir-r                           | No   | No    | Yes | No  | Yes | No   | 0.5    |              |
| 10b       | [46]     | Wheat   | Remote      | 1                      | ND(nir,g)                       | No   | Yes   | No  | No  | Yes | No   | 0.53   |              |
| 10c       | [46]     | Wheat   | Proximal    |                        | nir                             | No   | No    | No  | No  | Yes | No   | 0.63   |              |
| 10d       | [46]     | Wheat   | Proximal    |                        | ND(nir,r)                       | No   | No    | Yes | No  | Yes | No   | 0.63   |              |
| 11        | [34]     | Wheat   | Proximal    |                        | ND(g,r)                         | No   | Yes   | Yes | No  | No  | No   | 0.45   |              |
| 14a       | [49]     | Wheat   | Proximal    |                        | ND(g,r)                         | No   | Yes   | Yes | No  | No  | No   | 0.45   |              |
| 14b       | [49]     | Wheat   | Remote      | 30                     | swir                            | No   | No    | No  | No  | No  | Yes  | 0.5    |              |
| 15        | [50]     | Wheat   | Proximal    |                        | First derivative of raw spectra | Yes  | Yes   | Yes | Yes | Yes | Yes  | 0.92   | 0.5          |

|     |      |        |          |      |                                     |     |     |     |     |     |     |      |      |
|-----|------|--------|----------|------|-------------------------------------|-----|-----|-----|-----|-----|-----|------|------|
| 16  | [51] | Wheat  | Remote   | 30   | HH+SIPI (nir-b/nir-red)             | Yes | No  | Yes | No  | Yes | No  | 0.56 |      |
| 18  | [53] | Barley | Proximal |      | REIP                                | No  | No  | No  | Yes | No  | No  | 0.77 |      |
| 19a | [54] | Wheat  | Remote   | 0.4  | ND(nir,r)                           | No  | No  | Yes | No  | Yes | No  | 0.57 | 0.94 |
| 19b | [54] | Wheat  | Proximal |      | ND(nir,r)                           | No  | No  | Yes | No  | Yes | No  | 0.7  | 0.78 |
| 21  | [56] | Barley | Proximal |      | TCARI                               | No  | Yes | Yes | Yes | No  | No  | 0.78 |      |
| 22  | [57] | Wheat  | Proximal |      | SR(nir,g)                           | No  | Yes | No  | No  | Yes | No  | 0.79 | 0.65 |
| 23a | [58] | Wheat  | Remote   | 15   | ND(g,r)                             | No  | Yes | Yes | No  | No  | No  | 0.74 | 1.65 |
| 23b | [58] | Wheat  | Proximal |      | ND(g,r)                             | No  | Yes | Yes | No  | No  | No  | 0.77 | 0.89 |
| 25  | [60] | Wheat  | Remote   | 0.5  | Red-edge-Mean-Slope                 | No  | No  | No  | Yes | No  | No  | 0.65 |      |
| 29  | [62] | Wheat  | Proximal |      | ND(nir,r)                           | No  | No  | Yes | No  | Yes | No  | 0.62 |      |
| 31b | [64] | Barley | Remote   | 23.5 | SR(swir,g swir,r nir,g nir,r)       | No  | Yes | Yes | No  | Yes | Yes | 0.61 | 0.66 |
| 31c | [64] | Barley | Remote   | 10   | SR(swir,g swir,r nir,g nir,r)       | No  | Yes | Yes | No  | Yes | Yes | 0.51 | 0.57 |
| 32  | [65] | Wheat  | Remote   | 2.5  | ND(nir,g)                           | No  | Yes | No  | No  | Yes | No  | 0.28 |      |
| 33  | [66] | Wheat  | Remote   | 1000 | ND(nir,r)                           | No  | No  | Yes | No  | Yes | No  | 0.64 |      |
| 34  | [67] | Rice   | Remote   |      | ND(b,swir uv,b) +<br>band(nir swir) | Yes | No  | No  | No  | Yes | Yes | 0.8  |      |
| 36  | [69] | Wheat  | Remote   | 1000 | ND(nir,r)                           | No  | No  | Yes | No  | Yes | No  | 0.62 |      |
| 37  | [29] | Rice   | Remote   | 0.23 | ND(nir,g)                           | No  | Yes | No  | No  | Yes | No  | 0.51 | 0.25 |
| 43  | [71] | Wheat  | Proximal |      | ND(nir,r)                           | No  | No  | Yes | No  | Yes | No  | 0.74 |      |
| 44  | [72] | Wheat  | Remote   | 1000 | ND(nir,r)                           | No  | No  | Yes | No  | Yes | No  | 0.62 |      |
| 46  | [74] | Wheat  | Proximal |      | ND(nir,r)                           | No  | No  | Yes | No  | Yes | No  | 0.76 |      |
| 48  | [76] | Wheat  | Remote   | 10   | nir/(r+g)                           | No  | Yes | Yes | No  | Yes | No  | 0.8  | 1.28 |
| 49  | [77] | Wheat  | Proximal |      | TCARI                               | No  | Yes | Yes | Yes | No  | No  | 0.52 | 0.64 |
| 50  | [78] | Wheat  | Proximal |      | ND(nir,re)                          | No  | No  | No  | Yes | Yes | No  | 0.52 | 1.53 |
| 51  | [79] | Wheat  | Proximal |      | MSR+ND(nir,re)                      | No  | No  | Yes | Yes | Yes | No  | 0.77 | 1.16 |
| 52a | [80] | Wheat  | Remote   | 1000 | fPAR                                | Yes | Yes | Yes | No  | No  | No  | 0.57 |      |
| 52b | [80] | Wheat  | Remote   | 250  | ND(nir,r)                           | No  | No  | Yes | No  | Yes | No  | 0.45 |      |
| 53  | [81] | Wheat  | Remote   | 0.04 | REIP                                | No  | No  | No  | Yes | No  | No  | 0.86 | 0.61 |
| 54  | [25] | Wheat  | Proximal |      | ND(nir,r)                           | No  | No  | Yes | No  | Yes | No  | 0.69 | 1.09 |
| 56  | [83] | Wheat  | Remote   | 6.5  | ND(nir,r)                           | No  | No  | Yes | No  | Yes | No  | 0.67 |      |
| 57  | [6]  | Wheat  | Proximal |      | NRERI (nir-re/nir-r)                | No  | No  | Yes | Yes | Yes | No  | 0.73 |      |

|           |                     |         |          |       |             |            |             |     |      |       |     |      |      |      |      |     |
|-----------|---------------------|---------|----------|-------|-------------|------------|-------------|-----|------|-------|-----|------|------|------|------|-----|
| 59        | [84]                | Wheat   | Proximal |       | ND(nir,r)   | No         | No          | Yes | No   | Yes   | No  | 0.48 |      |      |      |     |
| 60        | [28]                | Wheat   | Remote   | 1     | ND(re,g)    | No         | Yes         | No  | Yes  | No    | No  | 0.21 | 0.45 |      |      |     |
| 62a       | [86]                | Wheat   | Remote   | 30    | ND(nir,g)   | No         | Yes         | No  | No   | Yes   | No  | 0.48 |      |      |      |     |
| 62b       | [86]                | Wheat   | Remote   | 2.5   | ND(nir,g)   | No         | Yes         | No  | No   | Yes   | No  | 0.47 |      |      |      |     |
| 62c       | [86]                | Wheat   | Remote   | 6.5   | ND(nir,re)  | No         | No          | No  | Yes  | Yes   | No  | 0.51 |      |      |      |     |
| 62d       | [86]                | Wheat   | Remote   | 1.8   | ND(nir,re)  | No         | No          | No  | Yes  | Yes   | No  | 0.55 |      |      |      |     |
| 62e       | [86]                | Wheat   | Remote   | 10    | ND(nir,re)  | No         | No          | No  | Yes  | Yes   | No  | 0.56 |      |      |      |     |
| 62f       | [86]                | Wheat   | Proximal |       | ND(774,742) | No         | No          | No  | Yes  | No    | No  | 0.56 |      |      |      |     |
| 65        | [87]                | Wheat   | Proximal |       | IREC+CVI    | No         | Yes         | Yes | Yes  | Yes   | No  | 0.47 |      |      |      |     |
| 68        | [26]                | Rice    | Remote   | 0.018 | ND(nir,g)   | No         | Yes         | No  | No   | Yes   | No  | 0.8  | 0.34 |      |      |     |
| 69        | [90]                | Wheat   | Proximal |       | MCARI/MTVI2 | No         | Yes         | Yes | Yes  | Yes   | No  | 0.85 | 1.02 |      |      |     |
| 73        | [31]                | Wheat   | Remote   | 10    | EVI         | No         | Yes         | Yes | No   | Yes   | No  | 0.52 | 0.38 |      |      |     |
| 77        | [97]                | Wheat   | Proximal |       | ND(nir,r)   | No         | No          | Yes | No   | Yes   | No  | 0.05 |      |      |      |     |
| 78        | [98]                | Wheat   | Proximal |       | SR(nir,r)   | No         | No          | Yes | No   | Yes   | No  | 0.14 |      |      |      |     |
| 79        | [99]                | Wheat   | Remote   | 10    | ND(nir,r)   | No         | No          | Yes | No   | Yes   | No  | 0.66 |      |      |      |     |
| 80        | [100]               | Wheat   | Proximal |       | ND(nir,r)   | No         | No          | Yes | No   | Yes   | No  | 0.99 |      |      |      |     |
| 81        | [101]               | Wheat   | Remote   | 0.06  | ND(nir,re)  | No         | No          | No  | Yes  | Yes   | No  | 0.6  | 1.48 |      |      |     |
| 84        | [104]               | Wheat   | Remote   |       | ND(nir,r)   | No         | No          | Yes | No   | Yes   | No  | 0.74 |      |      |      |     |
|           |                     |         |          |       | Spatial     | Best type  |             |     |      |       |     | Min  |      |      |      |     |
|           |                     |         |          |       | Sensor      | resolution | of spectral |     |      |       |     |      | Max  | RMSE |      |     |
| Entry ID. | Citation            | Crop    | type     | (m)   | feature     |            |             |     | Blue | Green | Red | RE   | NIR  | SWIR | R2   | (%) |
| 3a        | Basnet et al., 2003 | Barley  | Remote   | 30    | swir        |            |             |     | No   | No    | No  | No   | No   | Yes  | 0.71 |     |
| 3b        | Basnet et al., 2003 | Sorghum | Remote   | 30    | nir         |            |             |     | No   | No    | No  | No   | Yes  | No   | 0.03 |     |
| 3c        | Basnet et al., 2003 | Wheat   | Remote   | 15    | nir         |            |             |     | No   | No    | No  | No   | Yes  | No   | 0.22 |     |
| 3d        | Basnet et al., 2003 | Wheat   | Remote   | 30    | nir         |            |             |     | No   | No    | No  | No   | Yes  | No   | 0.64 |     |
| 4a        | Wright et al., 2003 | Wheat   | Remote   | 2.5   | SR(nir,r)   |            |             |     | No   | No    | Yes | No   | Yes  | No   | 0.35 |     |
| 4b        | Wright et al., 2003 | Wheat   | Remote   | 1     | nir         |            |             |     | No   | No    | No  | No   | Yes  | No   | 0.36 |     |

|     |                         |        |          |      |                                 |     |     |     |     |     |     |      |      |
|-----|-------------------------|--------|----------|------|---------------------------------|-----|-----|-----|-----|-----|-----|------|------|
| 8   | Wang et al., 2004       | Wheat  | Proximal |      | ND(g,b)                         | Yes | Yes | No  | No  | No  | No  | 0.97 | 0.17 |
| 10a | Wright et al., 2004     | Wheat  | Remote   | 2.5  | nir-r                           | No  | No  | Yes | No  | Yes | No  | 0.5  |      |
| 10b | Wright et al., 2004     | Wheat  | Remote   | 1    | ND(nir,g)                       | No  | Yes | No  | No  | Yes | No  | 0.53 |      |
| 10c | Wright et al., 2004     | Wheat  | Proximal |      | nir                             | No  | No  | No  | No  | Yes | No  | 0.63 |      |
| 10d | Wright et al., 2004     | Wheat  | Proximal |      | ND(nir,r)                       | No  | No  | Yes | No  | Yes | No  | 0.63 |      |
| 11  | Zhao et al., 2004       | Wheat  | Proximal |      | ND(g,r)                         | No  | Yes | Yes | No  | No  | No  | 0.45 |      |
| 14a | Zhao et al., 2005       | Wheat  | Proximal |      | ND(g,r)                         | No  | Yes | Yes | No  | No  | No  | 0.45 |      |
| 14b | Zhao et al., 2005       | Wheat  | Remote   | 30   | swir                            | No  | No  | No  | No  | No  | Yes | 0.5  |      |
| 15  | Apan et al., 2006       | Wheat  | Proximal |      | First derivative of raw spectra | Yes | Yes | Yes | Yes | Yes | Yes | 0.92 | 0.5  |
| 16  | Liu et al., 2006        | Wheat  | Remote   | 30   | HH+SIPI (nir-b/nir-red)         | Yes | No  | Yes | No  | Yes | No  | 0.56 |      |
| 18  | Petterson et al., 2006  | Barley | Proximal |      | REIP                            | No  | No  | No  | Yes | No  | No  | 0.77 |      |
| 19a | Reyniers et al., 2006   | Wheat  | Remote   | 0.4  | ND(nir,r)                       | No  | No  | Yes | No  | Yes | No  | 0.57 | 0.94 |
| 19b | Reyniers et al., 2006   | Wheat  | Proximal |      | ND(nir,r)                       | No  | No  | Yes | No  | Yes | No  | 0.7  | 0.78 |
| 21  | Pettersson et al., 2007 | Barley | Proximal |      | TCARI                           | No  | Yes | Yes | Yes | No  | No  | 0.78 |      |
| 22  | Xue et al., 2007        | Wheat  | Proximal |      | SR(nir,g)                       | No  | Yes | No  | No  | Yes | No  | 0.79 | 0.65 |
| 23a | Huang et al., 2008      | Wheat  | Remote   | 15   | ND(g,r)                         | No  | Yes | Yes | No  | No  | No  | 0.74 | 1.65 |
| 23b | Huang et al., 2008      | Wheat  | Proximal |      | ND(g,r)                         | No  | Yes | Yes | No  | No  | No  | 0.77 | 0.89 |
| 25  | Papale et al., 2008     | Wheat  | Remote   | 0.5  | Red-edge-Mean-Slope             | No  | No  | No  | Yes | No  | No  | 0.65 |      |
| 29  | Qualm et al., 2010      | Wheat  | Proximal |      | ND(nir,r)                       | No  | No  | Yes | No  | Yes | No  | 0.62 |      |
| 31b | Soderstrom et al., 2010 | Barley | Remote   | 23.5 | SR(swir,g swir,r nir,g nir,r)   | No  | Yes | Yes | No  | Yes | Yes | 0.61 | 0.66 |
| 31c | Soderstrom et al., 2010 | Barley | Remote   | 10   | SR(swir,g swir,r nir,g nir,r)   | No  | Yes | Yes | No  | Yes | Yes | 0.51 | 0.57 |

|     |                           |       |          |      |                                  |     |     |     |     |     |     |      |      |
|-----|---------------------------|-------|----------|------|----------------------------------|-----|-----|-----|-----|-----|-----|------|------|
| 32  | Song et al., 2010         | Wheat | Remote   | 2.5  | ND(nir,g)                        | No  | Yes | No  | No  | Yes | No  | 0.28 |      |
| 33  | Guasconi et al., 2011     | Wheat | Remote   | 1000 | ND(nir,r)                        | No  | No  | Yes | No  | Yes | No  | 0.64 |      |
| 34  | Han-ya et al., 2011       | Rice  | Remote   |      | ND(b,swir uv,b) + band(nir swir) | Yes | No  | No  | No  | Yes | Yes | 0.8  |      |
| 36  | Orlandini et al., 2011    | Wheat | Remote   | 1000 | ND(nir,r)                        | No  | No  | Yes | No  | Yes | No  | 0.62 |      |
| 37  | Ryu et al., 2011          | Rice  | Remote   | 0.23 | ND(nir,g)                        | No  | Yes | No  | No  | Yes | No  | 0.51 | 0.25 |
| 43  | Schoch, 2013              | Wheat | Proximal |      | ND(nir,r)                        | No  | No  | Yes | No  | Yes | No  | 0.74 |      |
| 44  | Feng et al., 2014         | Wheat | Remote   | 1000 | ND(nir,r)                        | No  | No  | Yes | No  | Yes | No  | 0.62 |      |
| 46  | Macnack et al., 2014      | Wheat | Proximal |      | ND(nir,r)                        | No  | No  | Yes | No  | Yes | No  | 0.76 |      |
| 48  | Wang et al., 2014         | Wheat | Remote   | 10   | nir/(r+g)                        | No  | Yes | Yes | No  | Yes | No  | 0.8  | 1.28 |
| 49  | Xu et al., 2014           | Wheat | Proximal |      | TCARI                            | No  | Yes | Yes | Yes | No  | No  | 0.52 | 0.64 |
| 50  | Li et al., 2015a          | Wheat | Proximal |      | ND(nir,re)                       | No  | No  | No  | Yes | Yes | No  | 0.52 | 1.53 |
| 51  | Li et al., 2015b          | Wheat | Proximal |      | MSR+ND(nir,re)                   | No  | No  | Yes | Yes | Yes | No  | 0.77 | 1.16 |
| 52a | Orlando et al., 2015      | Wheat | Remote   | 1000 | fPAR                             | Yes | Yes | Yes | No  | No  | No  | 0.57 |      |
| 52b | Orlando et al., 2015      | Wheat | Remote   | 250  | ND(nir,r)                        | No  | No  | Yes | No  | Yes | No  | 0.45 |      |
| 53  | Geipel et al., 2016       | Wheat | Remote   | 0.04 | REIP                             | No  | No  | No  | Yes | No  | No  | 0.86 | 0.61 |
| 54  | Magney et al., 2016       | Wheat | Proximal |      | ND(nir,r)                        | No  | No  | Yes | No  | Yes | No  | 0.69 | 1.09 |
| 56  | Mengmeng et al., 2017     | Wheat | Remote   | 6.5  | ND(nir,r)                        | No  | No  | Yes | No  | Yes | No  | 0.67 |      |
| 57  | Klem et al., 2018         | Wheat | Proximal |      | NRERI (nir-re/nir-r)             | No  | No  | Yes | Yes | Yes | No  | 0.73 |      |
| 59  | Rellafor, 2018            | Wheat | Proximal |      | ND(nir,r)                        | No  | No  | Yes | No  | Yes | No  | 0.48 |      |
| 60  | Rodrigues et al., 2018    | Wheat | Remote   | 1    | ND(re,g)                         | No  | Yes | No  | Yes | No  | No  | 0.21 | 0.45 |
| 62a | Prey & Schmidhalter, 2019 | Wheat | Remote   | 30   | ND(nir,g)                        | No  | Yes | No  | No  | Yes | No  | 0.48 |      |

|     |                           |       |          |       |             |    |     |     |     |     |    |      |      |
|-----|---------------------------|-------|----------|-------|-------------|----|-----|-----|-----|-----|----|------|------|
| 62b | Prey & Schmidhalter, 2019 | Wheat | Remote   | 2.5   | ND(nir,g)   | No | Yes | No  | No  | Yes | No | 0.47 |      |
| 62c | Prey & Schmidhalter, 2019 | Wheat | Remote   | 6.5   | ND(nir,re)  | No | No  | No  | Yes | Yes | No | 0.51 |      |
| 62d | Prey & Schmidhalter, 2019 | Wheat | Remote   | 1.8   | ND(nir,re)  | No | No  | No  | Yes | Yes | No | 0.55 |      |
| 62e | Prey & Schmidhalter, 2019 | Wheat | Remote   | 10    | ND(nir,re)  | No | No  | No  | Yes | Yes | No | 0.56 |      |
| 62f | Prey & Schmidhalter, 2019 | Wheat | Proximal |       | ND(774,742) | No | No  | No  | Yes | No  | No | 0.56 |      |
| 65  | Zhao et al., 2019         | Wheat | Proximal |       | IREC+CVI    | No | Yes | Yes | Yes | Yes | No | 0.47 |      |
| 68  | Hama et al., 2020         | Rice  | Remote   | 0.018 | ND(nir,g)   | No | Yes | No  | No  | Yes | No | 0.8  | 0.34 |
| 69  | Li et al., 2020           | Wheat | Proximal |       | MCARI/MTVI2 | No | Yes | Yes | Yes | Yes | No | 0.85 | 1.02 |
| 73  | Xu et al., 2020           | Wheat | Remote   | 10    | EVI         | No | Yes | Yes | No  | Yes | No | 0.52 | 0.38 |
| 77  | Kizilgeci et al., 2021    | Wheat | Proximal |       | ND(nir,r)   | No | No  | Yes | No  | Yes | No | 0.05 |      |
| 78  | Sandhu et al., 2021       | Wheat | Proximal |       | SR(nir,r)   | No | No  | Yes | No  | Yes | No | 0.14 |      |
| 79  | Santaga et al., 2021      | Wheat | Remote   | 10    | ND(nir,r)   | No | No  | Yes | No  | Yes | No | 0.66 |      |
| 80  | Savasli et al., 2021      | Wheat | Proximal |       | ND(nir,r)   | No | No  | Yes | No  | Yes | No | 0.99 |      |
| 81  | Veverka et al., 2021      | Wheat | Remote   | 0.06  | ND(nir,re)  | No | No  | No  | Yes | Yes | No | 0.6  | 1.48 |
| 84  | Fu et al., 2022           | Wheat | Remote   |       | ND(nir,r)   | No | No  | Yes | No  | Yes | No | 0.74 |      |

17 \*SR(band1, band2) is the simple ratio of band1 divided by band2; ND(band1, band2) is the normalized difference between bands  
18 (band1 – band2/band1 + band2) where band is either a category (b=blue, g=green, r=red, re=red-edge, nir=near infrared, swir=short-  
19 wave infrared, uv=ultra-violet) or a number (wavelength, in nm); FDRS=first derivative of raw spectra, HH=horizontal-horizontal  
20 radar backscatter, SIPI=structure insensitive pigment index, REIP=red-edge inflection point, REMS=red-edge mean slope,  
21 TCARI=transformed chlorophyll in absorption index, MSR=modified simple ratio, fPAR=fraction of absorbed photosynthetically

- 22 active radiation, IREC=inverted red-edge chlorophyll index, CVI=chlorophyll vegetation index, MCARI/MTVI2=ratio between the
- 23 modified chlorophyll absorption in reflectance index and the modified triangular vegetation index 2, EVI=enhanced vegetation index.



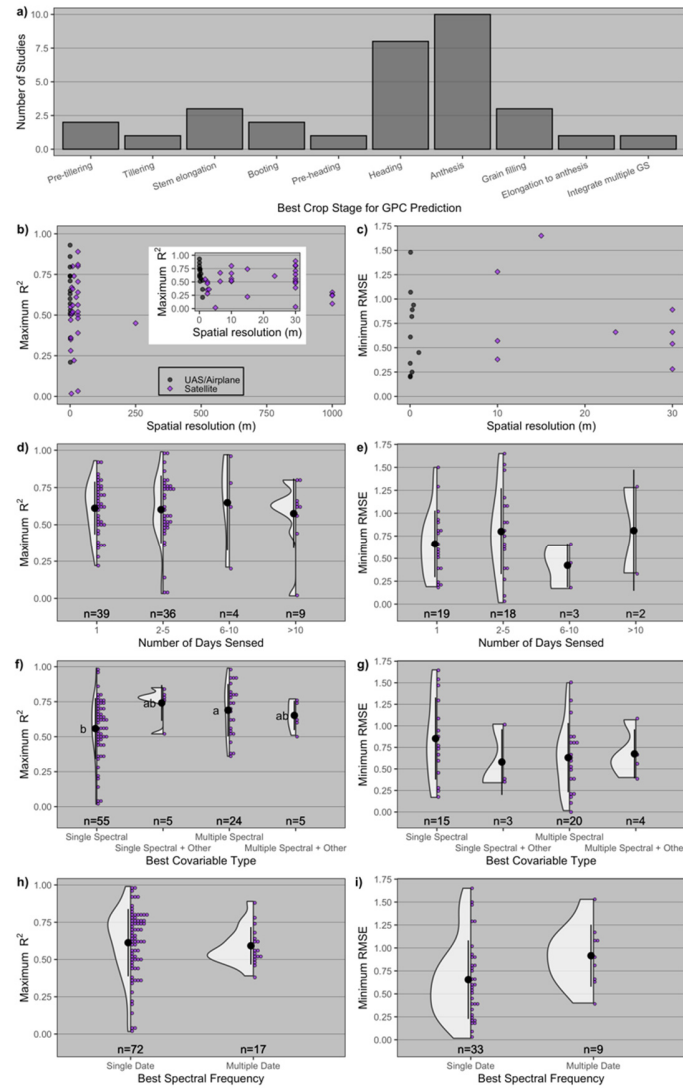

24

25 **Supplementary Figure S1. Best crop stage for grain protein concentration (GPC) prediction**

26 based on maximum  $R^2$  (a), and distribution of maximum  $R^2$  and minimum root mean squared

27 error (RMSE) explained by spatial resolution of remote sensors (b-c), number of days sensed by

28 proximal and remote sensors (d-e), best covariable type (f-g), and best spectral frequency (h-i). n

29 is the number of observations for each distribution. Black dot and lines represent the mean  $\pm$

30 standard deviation. In panel f, means followed by the same letter are not significantly different at

31  $\alpha=0.05$ .

32
